# Supplementary material for: A pincer auxiliary to force difficult lactamisations
Source: Royal Society of Chemistry journal article supplement (doi:10.1039/b303836j), 2003-01-01
Supplement: b303836j.doc [file b303836j.doc]

# Supplementary data

# A Pincer Auxiliary to Force Difficult Lactamisations

Hans Bieräugel, Hans E. Schoemaker, Henk Hiemstra, and Jan H. van Maarseveen*

*General:* Reagents were purchased at highest commercial quality and used without further purification unless stated otherwise. Chromatographic purification refers to flash chromatography[[1]](#endnote-2) using the indicated solvent (mixture) and ACROS silica gel (particle size 35–70 m). Infrared spectra were recorded using a Bruker IFS 28 spectrophotometer and absorptions are reported in units of cm-1. Nuclear magnetic resonance (NMR) spectra were obtained using a Bruker AC 200 (200 MHz) or an ARX 400 (400 MHz) spectrometer. Spectra are reported in units of ppm on the  scale relative to an internal standard of residual chloroform (7.27 ppm). Accurate mass determination data are reported as *m/z* (relative intensity) and were performed on a JEOL JMS SX/SX102A four-sector mass spectrometer, coupled to a JEOL MS-MP7000 data system. Electrospray (ESI) spectra were recorded on a Finnigan TSQ7000 mass spectrometer using Xcaliber 1.2 software for acquisition and data processing. The samples were introduced into the ESI-source by means of the flow injection technique in a solvent flow of 200 l containing H2O/MeOH 1:1 with 1% acetic acid.

**Synthesis of the linear peptides 2a,2c,2b and 2d**. These linear peptides where prepared from Boc-Ala-OH, H-Phe-OBn, H-Ala-OBn, Boc-Phe-OH, Bn-Phe-OBn[[2]](#endnote-3) and Bn-Ala-OBn[[3]](#endnote-4) using standard solution phase coupling procedures (**2a** ,**2b** EDC/HOBT, **2c**, **2d** DCC/DMAP). After coupling the carboxyl groups were liberated by catalytic hydrogenolysis (Pd/C,EtOAc/iPrOH = 4/1) and the Boc groups by neat trifluoroacetic acid treatment.

**Cyclizations towards 1c and 1d.** EDC (200 mg, 1.04 mmol) and HOBt (110 mg, 0.81 mmol) were dissolved in dichloromethane (8 cm3) and stirred for 45 minutes. Then **2c** or **2d** (80 mg, 0.18 mmol) were added and the resulting reaction mixture was stirred for 2 days. The reaction mixture was diluted with diethyl ether and successively washed with 5% HCl, aqueous NaHCO3, brine and dried (Na2SO4). After filtering and concentration of the filtrate in vacuo the residue was purified by preparative TLC (hexanes/EtOAc = 1/2) yielding 6.1 mg of **1c** (11%) or 17.0 mg of **1d** (30%).

**1c**. 1H NMR (400 MHz, CDCl3):  = 7.37-7.19 (m, 8H), 7.04 (d, 2H, *J* = 6.6 Hz), 6.41 (br s, 1H, NH), 5.12 (d, 1H, *J* = 15.1 Hz, NCHHPh), 4.27 (dd, 1H, *J* = 9.5 Hz and *J* = 4.8 Hz, H), 3.58 (dt, 1H, *J* = 10.5 Hz and *J* = 3.1 Hz, NCHHCH2), 3.43-3.38 (m, 1H, NCHHCH2), 3.38 (dd, 1H, *J* = 13.7 Hz and *J* = 4.7 Hz, PhCHHCH), 3.22 (dd, 1H, *J* = 13.7 Hz and *J* = 9.5 Hz, PhCHHCH), 3.08 (d, 1H, *J* = 15.1 Hz, NCHHPh), 2.92-2.80 (m, 2H, NCH2CH2). 13C NMR (100 MHz, CDCl3):  = 172.2, 171.0, 136.6, 136.5, 129.2, 128.8, 128.6, 127.5, 127.4, 127.3, 65.1, 51.2, 40.1, 39.9, 36.1. IR: 3241 (br), 1655. ESI-MS [C19H20N2O2+H]+: 309.

**1d**: 1H NMR (400 MHz, CDCl3):  = 7.35-7.26 (m, 10H, 2 x C6H5), 5.59 (br s, 1H, NH), 4.67 (s, 2H, PhCH2N), 4.60 (ddd, 1H, *J* = 9.3 Hz, *J* = 4.6 Hz and *J* = 2.6 Hz, H), 3.90 (ddd, 1H, *J* = 15.9 Hz, *J* = 12.8 Hz and *J* = 3.3 Hz, NCHHCH2), 3.44 (dd, 1H, *J* = 14.7 Hz and *J* = 4.8 Hz, PhCHHCH), 3.26 (ddd, 1H, *J* = 15.8 Hz, *J* = 4.9 Hz and *J* = 3.6 Hz, NCHHCH2), 2.93 (dd, 1H, *J* = 14.7 Hz and *J* = 9.6 Hz, PhHHCH), 2.53 (dt, 1H, *J* = 18.2 Hz and *J* = 2.5 Hz, NCH2CHH), 2.40 (ddd, 1H, *J* = 18.1 Hz, *J* = 12.7 Hz and *J* = 5.1 Hz, NCH2CHH). 13C NMR (100 MHz, CDCl3):  = 171.0. 169.7, 136.4, 135.9, 129.1, 128.9, 128.8, 128.1, 127.9, 127.2, 53.7, 50.3, 41.7, 36.8, 34.8. IR: 3250 (br), 1652. ESI-MS [C19H20N2O2+H]+: 309. HRMS (FAB) calculated for C19H21N2O2 (MH+) 309.1603, found 309.1606.

**3-*tert*-Butoxy-2-hydroxybenzaldehyde** **6**: 2,3-dihydroxybenz-aldehyde (10 g, 73.5 mmol) was dissolved in a mixture of benzene (250 cm3) and dichloromethane (400 cm3) and cooled (-60 °C). Then isobutene (~10 cm3) was added. To this stirred solution a few drops of trifluoromethanesulfonic acid were added, which was repeated every 15 minutes for 3 hours. After 1 hour another portion of isobutene (~10 cm3) was added. After 4 hours triethylamine was added until neutral pH. The reaction mixture was concentrated in vacuo and triturated with hexanes. The residue was subjected to flash chromatography (silica, hexanes with a trace EtOAc) to give 5.0 g (35%) of **6** as a colorless oil. 1H NMR (400 MHz, CDCl3):  = 10.89 (s, 1H, HCO), 9.86 (s, 1H, OH), 7.28-7.21 (m, 2H), 6.88-6.84 (m, 1H), 1.35 (s, 9H). 13C NMR (100 MHz, CDCl3):  = 196.1, 156.2, 143.6, 132.1, 128.2, 121.6, 118.9, 80.6, 28.4. IR: 2975, 1656, 1450, 1255, 1159.

**General procedures for the reductive aminations, Boc protection and coupling towards 3a and 3b**. Reductive amination: aldehyde **6** and the amine (1 equiv) were mixed in THF (1 M) with solid sodium sulfate (10 equiv) and stirred for 3 hours. Then Na(OAc)3BH (4 equiv) was added and the reaction mixture was stirred for 16 hours. Standard extractive working up procedures (adding EtOAc and aqueous NaHCO3) and flash chromatography (hexanes/EtOAc = 1/1), gave the secondary amines both in yields of 80%:

Towards **3a**:1H NMR (400 MHz, CDCl3):  = 7.37-7.34 (m, 5H, C6H5), 6.93 (dd, 1H, *J* = 8.0 Hz and *J* = 1.6 Hz), 6.75 (dd, 1H, *J* = 7.5 Hz and *J* = 1.5 Hz), 6.67 (t, 1H, *J* = 7.7 Hz), 5.13 (s, 2H, OCH2Ph), 3.96 (s, 2H, NCH2Ph), 2.91 (t, 2H, *J* = 6.2 Hz, NCH2CH2), 2.60 (t, 2H, *J* = 6.2 Hz, NCH2CH2), 1.38 (t, 9H, tBu). IR: 3300 (br), 2975, 1734, 1464, 1170.

Towards **3b**: 1H NMR (200 MHz, CDCl3):  = 9.09 (br s, 1H, OH), 7.38-7.34 (m, 5H), 7.26-7.21 (m, 3H), 7.07 (d, 2H, *J* = 2.5 Hz), 6.94-6.91 (m, 1H), 6.66-6.64 (m, 2H), 5.10 (s, 2H, OCH2Ph), 3.97 and 3.69 (AB, 2H, *J*AB = 13.5 Hz, NCH2), 3.63 (t, 1H, *J* = 6.6 Hz, H), 3.00 (d, 2H, *J* = 6.4 Hz, PhCH2), 2.18 (very br s, 1H, NH), 1.37 (s, 9H, tBu). IR: 2976, 1734, 1465, 1169.

Boc protection was carried out using Boc2O (1.05 equiv) in dichloromethane (towards **3a**: 1 hour (93%); towards **3b**: 16 hours (80%)).

Towards **3a**: 1H NMR (400 MHz, CDCl3):  = 7.34 (m, 5H, C6H5), 6.94 (dd, 1H, *J* = 8.0 Hz and *J* = 1.5 Hz), 6.87 (br d, 1H, *J* = 7.0 Hz), 6.72 (br d, 1H, *J* = 7.8 Hz), 5.09 (s, 2H, OCH2Ph), 4.44 (s, 2H, NCH2Ph), 3.52 (br m, 2H, NCH2CH2), 2.57 (br m, 2H, NCH2CH2), 1.45 (s, 9H, tBu), 1.38 (s, 9H, tBu). IR: 3504 (br), 2976, 1736, 1693, 1469, 1159. HRMS (FAB) calculated for C26H36NO6 (MH+) 458.2543, found 458.2550.

Towards **3b**: 1H NMR (400 MHz, CDCl3):  = 7.38-7.21 (m, 5H), 7.06 (d, 2H, *J* = 7.6 Hz), 6.98 (t, 2H, *J* = 8.3 Hz), 6.93 (dd, 1H, *J* = 6.7 Hz and *J* = 2.9 Hz), 6.77 (t, 1H, *J* = 7.8 Hz), 6.66-6.64 (m, 2H), 6.05 (br s, 1H, OH), 5.10 (s, 2H, OCH2Ph), 3.97 and 3.69 (AB, 2H, *J*AB = 13.5 Hz, NCH2), 3.63 (t, 1H, *J* = 6.7 Hz, H), 3.00 (d, 2H, *J* = 6.3 Hz, PhCH2), 1.42 (s, 9H, tBu), 1.38 (s, 9H, tBu). IR: 2977, 1742, 1698, 1455, 1157.

Subsequent esterification of the phenolic hydroxyl groups with Cbz-Phe-OH (1 equiv) and Cbz-Ala-OH (1 equiv) was performed in dichloromethane (0.2 M) using DCC (1.1 equiv) as the activating agent in the presence of DMAP (trace). After stirring of the reaction mixture overnight, the mixture was diluted (two volumes) with diethyl ether and the solids were removed by filtration. The filtrate was concentrated *in vacuo* and the residue was subjected to column chromatography (PE/EtOAc = 9/1  4/1) yielding the N- and C-terminal protected **3a** (82%) and **3b** (71%) as white foams.

Towards **3a**:1H NMR (400 MHz, CDCl3):  = 7.34-7.03 (m, 15H, 3 x C6H5), 6.94 (d, 1H, *J* = 8.0 Hz), 6.88 (d, 1H, *J* = 7.2 Hz), 6.71 (t, 1H, *J* = 7.8 Hz), 5.09 (s, 2H, OCH2Ph), 5.05 (s, 2H, OCH2Ph), 4.95 (m, 1H, H), 4.44 (s, 2H, NCH2Ph), 3.51 (br m, 2H, NCH2CH2), 3.39 (m, 1H, PhHHCH), 3.20-3.10 (m, 1H, PhHHCH), 2.56 (br m, 2H, NCH2CH2), 1.42 (s, 9H, tBu), 1.37 (s, 9H, tBu). IR: 3338 (br), 2976, 2934, 1734, 1697, 1157.

Towards **3b**: 1H NMR (400 MHz, CDCl3):  = 7.36-7.18 (m, 13H), 7.07 (d, 2H, *J* = 6.3 Hz), 6.97 (dd, *J* = 8.0 Hz and *J* = 1.3 Hz), 6.89 (d, 1H, *J* = 6.8 Hz), 6.78 (t, 1H *J* = 7.9 Hz), 5.58 (br t, 1H, NH), 5.14-5.04 (m, 4H, 2 x OCH2Ph), 4.23 and 3.81 (AB, 2H, *J*AB = 17.3 Hz, NCH2Ph), 4.23 (m, 1H, H), 3.49-3.39 (m, 2H, NCH2CH2), 3.38 (dd, *J* = 14.0 Hz and *J* = 6.1 Hz, PhCHH), 3.21 (dd, 1H, *J* = 14.0 Hz and *J* = 9.0 Hz, PhCHH), 2.52-2.39 (m, 2H, NCH2CH2), 1.52 (s, 9H, tBu), 1.33 (s, 9H, tBu). IR: 3410 (br), 2979, 1759, 1725, 1648, 1276, 1257, 1111.

After catalytic hydrogenolysis (EtOAc/*i*PrOH = 4/1, H2/Pd/C) **3a** and **3b** were isolated both in yields of 80% (2 steps).

**3a**:1H NMR (400 MHz, CDCl3):  = 7.31 (m, 5H, C6H5), 7.12 (d, 1H, *J* = 7.9 Hz), 7.05 (dd, 1H, *J* = 8.1 Hz and *J* = 1.4 Hz), 6.98 (br m, 1H), 5.11 (br s, 3H, NH3), 4.44 (m, 2H, NCH2Ph), 4.14 (br m, 1H, H), 3.45-3.18 (m, 3H, NCH2CH2 and PhHHCH), 3.01 (dd, 1H, *J* = 13.7 Hz and *J* = 9.0 Hz), 2.42 (br m, 2H, NCH2CH2), 1.45 (s, 9H, tBu), 1.37 (s, 9H, tBu). IR: 2975, 2931, 1764, 1687, 1159.

**3b**. 1H NMR (400 MHz, CDCl3): (spectrum is very broadened)  = 7.3-6.6 (br m, 8H), 5.2-2.6 (very br m, 9H), 1.50 (s, 9H, tBu), 1.30 (s, 9H, tBu). IR: 2977, 1749, 1696, 1160.

**Tethered macrolactamization to give 4a and 4b**. 1 mmol of amino acid **3a** or **3b** was added to a mixture of EDC (5 equiv) and HOBT (5 equiv) in dichloromethane (60 cm3) and of DMF (15 cm3) and stirred for 16 hours. The reaction mixtures were diluted with ether (350 cm3) and subsequently washed with 5% HCl, H2O, saturated aqueous NaHCO3 and brine. After drying (Na2SO4), the volatiles were removed under reduced pressure and the residue was purified by gradient flash chromatography (hexanes/EtOAc = 9/1 to 1/1), yielding **4a** or **4b** in yields of 84% and 71%, respectively.

**4a**: 1H NMR (400 MHz, CDCl3):  = 7.34-7.17 (m, 5H, C6H5), 7.04 (m, 2H), 6.91 (br m, 1H), 5.80 (br s, 0.6H, NH), 5.18 (br s, 0.4H, NH), 4.71 (br m, 0.4H, H), 4.45-4.08 (m, 2.2H), 3.70 (m, 1H), 3.42 (m, 1H), 3.21 (dd, 0.4H, *J* = 13.9 Hz and *J* = 3.7 Hz), 3.07 (br m, 0.6H), 2.86 (dd, 0.4H, *J* = 13.6 Hz and *J* = 8.1 Hz), 2.64 (br m, 0.6H), 2.28 (m, 1H), 1.33 (s, 9H, tBu), 1.23 (s, 9H, tBu). IR:3309 (br), 2975, 2929, 1771, 1685, 1653, 1161. HRMS (FAB) calculated for C28H37N2O6 (MH+) 497.2652, found 497.2645.

**4b**. 1H NMR (400 MHz, CDCl3): (spectrum is broadened, mixture of conformers and 1:1 complex with EtOAc) 7.9 (br m, 0.4H), 7.46-7.44 (m, 0.6H), 7.30-7.21 (m, ~3H), 7.02 (br m, ~3H), 6.90 (br m, 1H), 5.09 (br s, 1H, NH), 4.40 (br m, 1H, H), 4.12 (q, 2H, EtOAc), 3.92, br m, 2H, NCH2Ph), 3.60-3.08 (br m, 4H, PhCH2CH and NCH2CH2), 2.58 (br m, 2H, NCH2CH2), 2.04 (s, 3H, EtOAc), 1.30 (s, 9H, tBu), 1.26 (t, 3H, EtOAc), 1.11 (s, 9H, tBu). IR: 3334, 2978, 1762, 1668, 1457, 1162. HRMS (FAB) calculated for C28H37N2O6 (MH+) 497.2652, found 497.2669.

**Templated ring-contraction towards** **1g and 1h**.

**4a** (0.2 mmol) or **4b** (0.2 mmol) were added to a mixture of dichloromethane (1 cm3) and trifluoroacetic acid (1 cm3). After standing for 1 hour (for **4b** 16 hours) the mixture was concentrated in vacuo and then dissolved in EtOAc (8 cm3), solid NaHCO3 (large excess) was added and the resulting suspension was stirred for 3 hours. Filtering, concentrating in vacuo and gradient flash chromatography (hexanes/EtOAc = 1/1 to EtOAc/*i*PrOH = 9/1) yielded **1g** or **1h** both in yields of 79%.

**1g**: 1H NMR (400 MHz, CDCl3): (1:1 complex with EtOAc) 9.37 (s, 1H, OH), 7.35-7.24 (m, 5H), 6.92 (dd, 1H, *J* = 7.9 Hz and *J* = 1.2 Hz), 6.75 (t, 1H, *J* = 7.7 Hz), 6.67 (dd, 1H, *J* = 7.6 Hz and *J* = 1.3 Hz), 6.01 (br s, 1H, NH), 5.85 (s, 1H, OH), 4.62-4.52 (m, 1H, H), 4.59 and 4.44 (AB, 2H, *J*AB = 14.5 Hz, PhCH2N), 3.98 (dt, 1H, *J* = 15.6 Hz and *J* = 3.4 Hz, NCHHCH2), 3.51 (dt, 1H, *J* = 15.7 Hz and *J* = 4.4 Hz, NCHHCH2), 3.40 (dd, 1H, *J* = 14.6 Hz and *J* = 4.9 Hz, CHHCH), 2.90 (dd, 1H, *J* = 14.6 Hz and *J* = 9.3 Hz, CHHCH), 2.83-2.52 (m, 2H, NCH2CH2). 13C NMR (100 MHz, CDCl3):  = 171.9, 170.7, 146.1, 142.5, 135.4, 129.0, 129.0, 127.4, 121.5, 121.2, 120.3, 115.5, 53.8, 43.5, 36.5, 34.4. IR: 3191 (very br), 1637. HRMS (FAB) calculated for C19H21N2O4 (MH+) 341.1501, found 341.1507.

**1h**. 1H NMR (400 MHz, CDCl3):  = 9.47 (s, 1H, OH), 7.34-7.26 (m, 2H), 7.14 (d, 2H, *J* = 6.6 Hz), 6.88 (d, 1H, *J* = 6.8 Hz), 6.70 (t, 1H, *J* = 7.8 Hz), 6.57 (d, 1H, *J* = 7.6 Hz), 6.34 (br d, 1H, *J* = 4.0 Hz, NH), 5.85 (br s, 1H, OH), 4.55 (t, 1H, *J* = 6.8 Hz, H), 4.49 and 3.78 (AB, 2H, *J*AB = 14.8 Hz, PhCH2N), 3.46-3.31 (m, 2H, NCH2CH2), 3.29 (d, 2H, *J* = 6.8 Hz, Ph CH2CH), 2.73-2.59 (m, 2H, NCH2CH2). 13C NMR (100 MHz, CDCl3):  =174.5, 169.9, 145.8, 142.5, 135.8, 129.2, 128.9, 127.5, 121.7, 121.3, 120.2, 115.2, 66.9, 50.4, 39.6, 39.4, 35.2. IR: 3246 (br), 1649, 1478, 1356, 1265. HRMS (FAB) calculated for C19H21N2O4 (MH+) 341.1501, found 341.1512.

**Removal of the auxiliary**:

The diol (600 mg, 1.8 mmol) was dissolved in acetone (10 cm3) together with methyl iodide (3 cm3) and K2CO3 (excess). The resulting suspension was heated at 45 °C with stirring for 16 hours. After filtration and concentration of the filtrate in vacuo the dimethoxy compounds were obtained in virtually quantitative yield which were used in the next step without further purification.

After dimethylation of **1g**: 1H NMR (400 MHz, CDCl3):  = 7.36-7.27 (m, 5H, C6H5), 7.03 (t, 1H, *J* = 7.9 Hz), 6.89 (dd, 1H, *J* = 7.8 Hz and *J* = 1.2 Hz), 6.87 (dd, 1H, *J* = 8.1 Hz and *J* = 1.2 Hz), 5.58 (br s, 1H, NH), 4.72 (AB, 2H, *J*AB = 14.3 Hz, PhCH2N), 4.59-4.55 (m, 1H, H), 3.89-3.81 (m, 1H, PhCHHCH), 3.87 (s, 3H, OCH3), 3.83 (s, 3H, OCH3), 3.43-3.35 (m, 2H, NCH2CH2), 2.90 (dd, 1H, *J* = 14.7 Hz and *J* = 9.6 Hz, CHHCH), 2.54-2.38 (m, 2H, NCH2CH2). IR: 2933, 1655. ESI-MS [C21H24N2O4+H]+: 369.

After dimethylation of **1h**: 1H NMR (400 MHz, CDCl3):  = 7.52-7.26 (m, 3H), 7.22 (d, 2H, *J* = 6.8 Hz), 6.93 (t, 2H, *J* = 7.9 Hz), 6.91 (br s, 1H, NH), 6.78 (d, 1H, *J* = 7.2 Hz), 6.63 (d, 1H, *J* = 7.6 Hz), 5.00 (d, 1H, *J* = 15.0 Hz, NCHHPh), 4.30 (dd, 1H, *J* = 9.6 Hz and *J* = 4.5, H), 3.80 (s, 3H, OCH3), 3.67 (s, 3H, OCH3), 3.50-3.47 (m, 1H, NCHHCH2), 3.39-3.18 (m, 3H, NCHHCH2 and PhCH2CH), 3.23 (d, 1H, *J* = 15.0 Hz, NCHHCH), 2.82-2.72 (m, 2H, NCH2CH2). 13C NMR (100 MHz, CDCl3):  = 172.3, 171.2, 152.5, 147.2, 136.8, 130.2, 129.4, 128.7, 127.1, 124.0, 120.8, 111.7, 65.3, 60.4, 55.5, 46.0, 40.0, 39.8, 36.3. IR: 3250 (br), 2937, 1658, 1478. ESI-MS [C21H24N2O4+H]+: 369.

Dissolving metal reduction: to cooled liquid ammonia (~10 cm3) small sodium pieces (cut under hexanes) were added until the dark blue/gray color persisted. Then dimethoxy compound **1h** (109 mg, 0.3 mmol) was added and the reaction mixture was stirred for 12 minutes. Solid NH4Cl was added until colorless and the ammonia was allowed to evaporate. To the residue, EtOAc/*i*PrOH = 1/1 was added, the suspension was filtered, concentrated in vacuo and the residue was purified by flash column chromatography (EtOAc) to yield 42 mg (65%) of **1a** together with 5 mg (5%) starting material.

**1a**: m.p. 205-206 °C. []D23 = -10.8 (*c*=1.8 in methanol). 1H NMR (400 MHz, CDCl3):  = 7.36-7.26 (m, 5H, C6H5), 6.45 (br s, 1H, NH), 5.77 (br s, 1H, NH), 4.49-4.44 (m, 1H, H), 3.75-3.66 (m, 1H, NCHHCH2), 3.41-3.32 (m, 2H, PhCHHCH and NCHHCH2), 2.89 (dd, 1H, *J* = 9.3 Hz and *J* = 14.6 Hz, PhHHCH), 2.77-2.63 (m, 2H, C(O)HH). 13C NMR (100 MHz, CDCl3):  = 171.7, 171.6, 135.8, 129.1, 128.9, 127.2, 53.6, 36.8, 36.3, 36.1. IR: 3422 (br), 2923, 1638, 1442. ESI-MS [C12H14N2O2+H]+: 219. HRMS (FAB) calculated for C12H15N2O2 (MH+) 219.1128, found 219.1150.

**External tethered macrolactonization and templated ring-contraction to give 1f**. **5a** and **5b** were prepared by reductive amination of H-Ala-Phe-OBn and H-Phe-Ala-OBn with 2-hydroxybenzaldehyde and subsequent liberation of the carboxyl groups by catalytic hydrogenolysis according to the procedures described above. The ring-closing reactions were performed according to the procedure as described by Meutermans and coworkers.[[4]](#endnote-5)

**1f**. 1H NMR (400 MHz, CDCl3):  = 8.83 (br s, 1H, OH), 7.33-7.14 (m, 6H), 7.01 (d, 1H, *J* = 7.1 Hz), 6.89 (d, 1H, *J* = 8.1 Hz), 6.78 (t, 1H, *J* = 7.3 Hz), 6.35 (br s, 1H, NH), 4.56 (d, 1H, *J* = 15.1 Hz, PhCHHN), 4.52 (t, 1H, *J* = 6.6 Hz, H), 3.76 (d, 1H, *J* = 14.9 Hz, PhCHHN), 3.45-3.30 (m, 2H, NCH2CH2), 3.26 (d, 1H, *J* = 6.7 Hz, PhCH2CH), 2.71-2.59 (m, 2H, NCH2CH2). 13C NMR (100 MHz, CDCl3):  = 174.2, 170.1, 155.6, 136.0, 131.1, 130.4, 129.2, 128.9, 127.4, 121.2, 119.7, 117.2, 66.5, 50.2, 39.8, 39.5, 35.2. IR: 3231 (very br), 1650, 1456. ESI-MS [C19H20N2O3+H]+: 325. HRMS (FAB) calculated for C19H21N2O3 (MH+) 325.1552 , found 325.1548.

References

1. W. C. Still, M. Kahn, A. Mitra, *J. Org. Chem.* 1978, **43**, 2923-2925. [↑](#endnote-ref-2)
2. Prepared as described for the synthesis of Bn-Phe-OMe. See: J. D. Park, K. J. Lee, D. H. Kim, *Bioorg. Med. Chem.* 2001, **9**, 237-244. [↑](#endnote-ref-3)
3. K. Hayashi, K.-I. Nunami, K. Sakai, Y. Ozaki, J. Kato, *Chem. Pharm. Bull.* 1983, **31**, 3553-3561. [↑](#endnote-ref-4)
4. W. D. F. Meutermans, S. W. Golding, G. T. Bourne, L. P. Miranda, M. J. Dooley, P. F. Alewood, M. L. Smythe, *J. Am. Chem. Soc.* 1999, **121**, 9790-9796. [↑](#endnote-ref-5)
